# Supplementary material for: The Association between Sulfonylurea Use and All-Cause and Cardiovascular Mortality: A Meta-Analysis with Trial Sequential Analysis of Randomized Clinical Trials
Source: PubMed Central journal article supplement (PMC4829174; doi:10.1371/journal.pmed.1001992), 2016-04-12

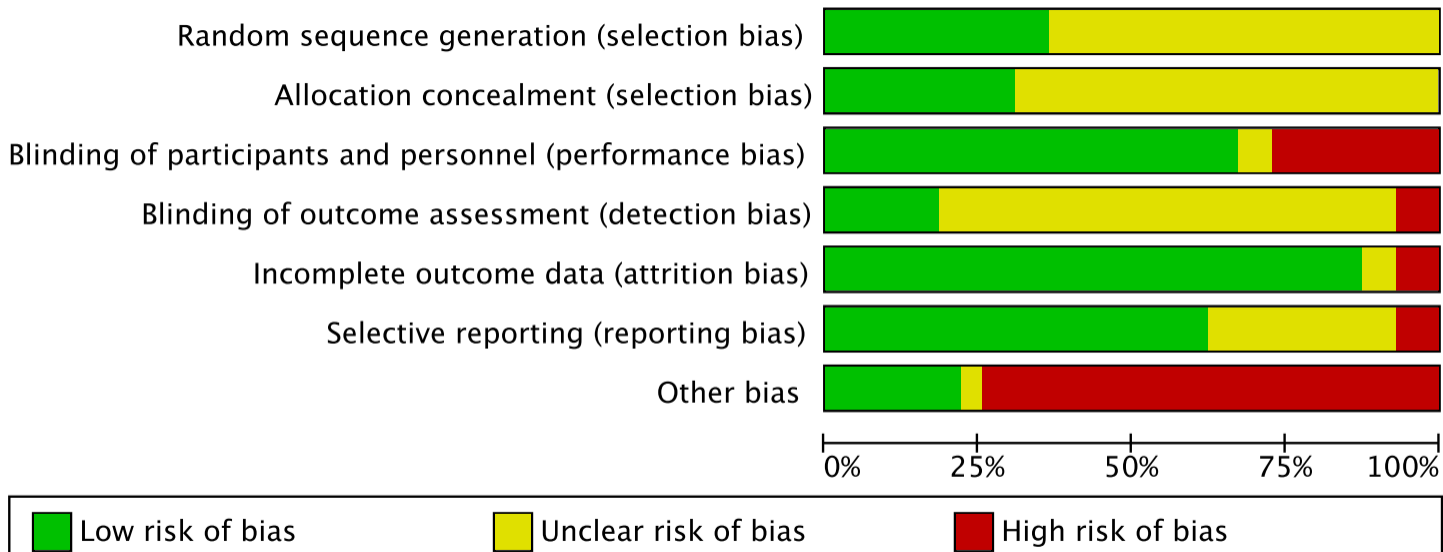

Supplement: pmed.1001992.s001.pdf [file pmed.1001992.s001.pdf]
