# Supplementary material for: The Association between Sulfonylurea Use and All-Cause and Cardiovascular Mortality: A Meta-Analysis with Trial Sequential Analysis of Randomized Clinical Trials
Source: PubMed Central journal article supplement (PMC4829174; doi:10.1371/journal.pmed.1001992), 2016-04-12
Supplement: pmed.1001992.s002.pdf [file pmed.1001992.s002.pdf]

|                              | Random sequence generation (selection bias) | Allocation concealment (selection bias) | Blinding of participants and personnel (performance bias) | Blinding of outcome assessment (detection bias) | Incomplete outcome data (attrition bias) | Selective reporting (reporting bias) | Other bias |
|------------------------------|---------------------------------------------|-----------------------------------------|-----------------------------------------------------------|-------------------------------------------------|------------------------------------------|--------------------------------------|------------|
| Abbatecola [39]              | ?                                           | ?                                       | -                                                         | ?                                               | -                                        | +                                    | +          |
| Ahren (Albiglutide) [40]     | ?                                           | ?                                       | +                                                         | ?                                               | +                                        | ?                                    | -          |
| Ahrén (Placebo) [40]         | ?                                           | ?                                       | +                                                         | ?                                               | +                                        | ?                                    | -          |
| Ahrén (Sitagliptin) [40]     | ?                                           | ?                                       | +                                                         | ?                                               | +                                        | ?                                    | -          |
| Alvarsson [41]               | ?                                           | ?                                       | -                                                         | -                                               | +                                        | +                                    | +          |
| Arjona Ferreira [42]         | +                                           | +                                       | +                                                         | ?                                               | +                                        | +                                    | -          |
| Arjona Ferreira [43]         | +                                           | +                                       | +                                                         | ?                                               | +                                        | +                                    | -          |
| Birkeland [44]               | ?                                           | ?                                       | -                                                         | ?                                               | +                                        | -                                    | -          |
| Campbell [45]                | ?                                           | ?                                       | -                                                         | ?                                               | +                                        | ?                                    | ?          |
| Cefalu [46]                  | +                                           | +                                       | +                                                         | +                                               | +                                        | +                                    | -          |
| Clauson [47]                 | ?                                           | ?                                       | -                                                         | ?                                               | +                                        | -                                    | ?          |
| Del Prato [48]               | ?                                           | ?                                       | +                                                         | +                                               | +                                        | +                                    | -          |
| Ferrannini [49]              | ?                                           | ?                                       | +                                                         | ?                                               | +                                        | +                                    | -          |
| Filozof [50]                 | ?                                           | ?                                       | +                                                         | ?                                               | +                                        | +                                    | -          |
| Foley [51]                   | ?                                           | ?                                       | +                                                         | ?                                               | +                                        | +                                    | -          |
| Gallwitz [52]                | +                                           | +                                       | -                                                         | -                                               | -                                        | ?                                    | -          |
| Gallwitz [53]                | +                                           | +                                       | +                                                         | +                                               | -                                        | +                                    | -          |
| Garber [54]                  | +                                           | +                                       | +                                                         | -                                               | -                                        | +                                    | -          |
| Gerich [55]                  | ?                                           | ?                                       | +                                                         | ?                                               | +                                        | ?                                    | -          |
| Gerstein [56]                | ?                                           | ?                                       | +                                                         | +                                               | +                                        | +                                    | -          |
| Giles [57]                   | ?                                           | ?                                       | +                                                         | ?                                               | +                                        | +                                    | -          |
| Göke [58]                    | +                                           | +                                       | +                                                         | ?                                               | +                                        | +                                    | -          |
| Hamann [59]                  | +                                           | +                                       | +                                                         | ?                                               | +                                        | +                                    | -          |
| Hanefeld [60]                | ?                                           | ?                                       | +                                                         | ?                                               | +                                        | +                                    | -          |
| Home [61]                    | +                                           | +                                       | -                                                         | +                                               | +                                        | +                                    | -          |
| Hong [62]                    | +                                           | +                                       | +                                                         | ?                                               | +                                        | +                                    | +          |
| Jain [63]                    | ?                                           | ?                                       | +                                                         | ?                                               | +                                        | +                                    | -          |
| Johnston (Miglitol) [64]     | ?                                           | ?                                       | +                                                         | ?                                               | ?                                        | ?                                    | -          |
| Johnston (Placebo) [64]      | ?                                           | ?                                       | +                                                         | ?                                               | ?                                        | ?                                    | -          |
| Kahn (Metformin) [65]        | +                                           | +                                       | +                                                         | +                                               | +                                        | +                                    | -          |
| Kahn (Rosiglitazone) [65]    | +                                           | +                                       | +                                                         | +                                               | +                                        | +                                    | -          |
| Kaku [66]                    | ?                                           | ?                                       | -                                                         | -                                               | +                                        | -                                    | -          |
| Lundershausen [67]           | ?                                           | ?                                       | +                                                         | ?                                               | +                                        | -                                    | +          |
| Madsbad [68]                 | ?                                           | ?                                       | +                                                         | ?                                               | +                                        | ?                                    | -          |
| Marbury [69]                 | ?                                           | ?                                       | +                                                         | ?                                               | +                                        | +                                    | -          |
| Matthews [70]                | ?                                           | ?                                       | +                                                         | ?                                               | ?                                        | ?                                    | -          |
| Mazzone [71]                 | ?                                           | ?                                       | +                                                         | +                                               | +                                        | +                                    | -          |
| Nakamura (Voglibose) [72]    | +                                           | ?                                       | ?                                                         | ?                                               | +                                        | ?                                    | +          |
| Nakamura (Natglinide) [72]   | +                                           | ?                                       | ?                                                         | ?                                               | +                                        | ?                                    | +          |
| Nakamura (Pioglitazone) [72] | +                                           | ?                                       | ?                                                         | ?                                               | +                                        | ?                                    | +          |
| Nauck [73]                   | +                                           | +                                       | +                                                         | ?                                               | +                                        | +                                    | -          |
| Nauck [74]                   | ?                                           | ?                                       | +                                                         | ?                                               | +                                        | +                                    | -          |
| Nissen [75]                  | +                                           | +                                       | +                                                         | +                                               | +                                        | +                                    | -          |
| Perriello [76]               | ?                                           | ?                                       | +                                                         | ?                                               | +                                        | +                                    | -          |
| Petrica [77]                 | ?                                           | ?                                       | -                                                         | +                                               | +                                        | +                                    | +          |
| Petrica [78]                 | ?                                           | ?                                       | -                                                         | ?                                               | +                                        | ?                                    | +          |
| Quatraro [79]                | ?                                           | ?                                       | -                                                         | ?                                               | +                                        | ?                                    | +          |
| Ridderstrale [80]            | ?                                           | ?                                       | +                                                         | ?                                               | +                                        | +                                    | -          |
| Ristic [81]                  | ?                                           | ?                                       | +                                                         | ?                                               | +                                        | +                                    | -          |
| Rosenstock [82]              | ?                                           | ?                                       | +                                                         | ?                                               | +                                        | +                                    | -          |
| Tolman [83]                  | +                                           | +                                       | +                                                         | ?                                               | +                                        | +                                    | -          |
| UKPDS (Diet) [2]             | +                                           | +                                       | -                                                         | ?                                               | +                                        | +                                    | -          |
| UKPDS (Insulin) [2]          | +                                           | +                                       | -                                                         | ?                                               | +                                        | +                                    | -          |
| Vähätalo (Insulin) [84]      | ?                                           | ?                                       | -                                                         | ?                                               | +                                        | ?                                    | +          |
| Vähätalo (Metformin) [84]    | ?                                           | ?                                       | -                                                         | ?                                               | +                                        | ?                                    | +          |
